# Supplementary material for: Longitudinal study of immunity to SARS-CoV2 in Ocrelizumab-treated multiple sclerosis patients up to 2 years after COVID-19 vaccination
Source: bioRxiv or medRxiv preprint supplement (doi:10.1101/2024.01.23.24301671), 2024-01-24
Supplement: Supplementary file [file media-2.pdf]

| anonymizedid | redcap_event_name        | assay_samp<br>le_date_coll<br>ecte | anti_sars_c<br>ov_2_s qua<br>nt | t_cell_elispo<br>t_ifng | t_cell_elispo<br>t_il_2 | igg_spike_1<br>1000_igg_spi<br>ke | covid_cou<br>nt | monoclon<br>als_yn | ic50WT | ic50Omic<br>ron |
|--------------|--------------------------|------------------------------------|---------------------------------|-------------------------|-------------------------|-----------------------------------|-----------------|--------------------|--------|-----------------|
| 40           | baseline_arm_1           | 4/22/2021                          | 0.4                             | 30                      | 0                       | 279                               | 1               | 0                  |        |                 |
| 40           | 4_weeks_post_dose_arm_1  | 7/15/2021                          | 0.4                             | 170                     | 90                      | 39                                | 1               | 0                  | 10     | 10              |
| 40           | 12_weeks_post_dose_arm_1 | 9/8/2021                           | 0.4                             | 390                     | 200                     | 47                                | 1               | 0                  |        |                 |
| 40           | 24_weeks_post_dose_arm_1 | 12/7/2021                          | 0.4                             | 250                     | 50                      | 260                               | 1               | 0                  |        |                 |
| 40           | bv_4_weeks_post_do_arm_2 | 1/14/2022                          | 0.4                             | No PBMC                 | No PBMC                 | 260                               | 1               | 0                  |        |                 |
| 40           | bv_12_weeks_post_d_arm_2 | 3/16/2022                          | 0.4                             | 1880                    | 600                     | 193                               | 1               | 0                  | 10     | 10              |
| 40           | bv_24_weeks_post_d_arm_2 | 6/8/2022                           | 9904                            |                         |                         | 834                               | 1               | 1                  | 10     | 10              |
| 40           | bv_48_weeks_post_d_arm_2 | 11/16/2022                         | 897                             | 210                     | 40                      |                                   | 1               | 1                  |        |                 |
| 28           | baseline_arm_1           | 4/26/2021                          | 9.43                            | 220                     | 160                     | 3467                              | 1               | 0                  | 27     | 10              |
| 28           | 4_weeks_post_dose_arm_1  | 7/16/2021                          | 387.3                           | PBMC LOST               | PBMC LOST               | 12406                             | 1               | 0                  | 177    | 10              |
| 28           | 12_weeks_post_dose_arm_1 | 9/10/2021                          | 106                             | 410                     | 0                       | 2370                              | 1               | 0                  |        |                 |
| 28           | 24_weeks_post_dose_arm_1 | 12/2/2021                          | 56.97                           | 430                     | 10                      | 2041                              | 1               | 0                  |        |                 |
| 28           | 48_weeks_post_dose_arm_1 | 6/3/2022                           | 21.5                            |                         |                         | 10185.25                          | 1               | 0                  |        |                 |
| 57           | baseline_arm_1           | 4/29/2021                          | 0.4                             | 10                      | 10                      | 1704                              | 1               | 0                  | 10     | 10              |
| 57           | 4_weeks_post_dose_arm_1  | 7/16/2021                          | 0.4                             | PBMC LOST               | PBMC LOST               | 5971                              | 2               | 0                  | 10     | 10              |
| 57           | 12_weeks_post_dose_arm_1 | 9/10/2021                          | 0.95                            | 1660                    | 80                      | 2534                              | 2               | 0                  |        |                 |
| 57           | 24_weeks_post_dose_arm_1 | 12/2/2021                          | 0.4                             | 190                     | 10                      | 1629                              | 2               | 0                  |        |                 |
| 57           | bv_4_weeks_post_do_arm_2 | 3/31/2022                          | 0.4                             | 3780                    | 580                     | 15864.75                          | 2               | 0                  | 10     | 10              |
| 57           | bv_12_weeks_post_d_arm_2 | 5/26/2022                          | 0.5                             | 6000                    | 1820                    | 13935.25                          | 2               | 0                  |        |                 |
| 57           | bv_24_weeks_post_d_arm_2 | 8/30/2022                          | 0.57                            | 3890                    | 270                     | 12005.25                          | 2               | 0                  | 10     | 10              |
| 57           | bv_48_weeks_post_d_arm_2 | 2/21/2023                          | 0.43                            | 7150                    | 20                      | 11901.25                          | 2               | 0                  |        |                 |
| 7            | baseline_arm_1           | 1/25/2021                          | 0.4                             | No PBMC                 | No PBMC                 | 43                                | 0               | 0                  | 10     | 10              |
| 7            | 4_weeks_post_dose_arm_1  | 5/19/2021                          | 4725                            | 490                     | 830                     | 29653                             | 0               | 0                  | 5851.5 | 26.18           |
| 7            | 12_weeks_post_dose_arm_1 | 7/14/2021                          | 3966                            | PBMC LOST               | PBMC LOST               | 28055                             | 0               | 0                  |        |                 |
| 41           | baseline_arm_1           | 1/15/2021                          | 0.4                             | No response             | No response             | 192                               | 1               | 0                  | 10     |                 |
| 41           | 4_weeks_post_dose_arm_1  | 7/19/2021                          | 0.4                             | PBMC LOST               | PBMC LOST               | 160                               | 1               | 0                  | 14     | 10              |
| 41           | 12_weeks_post_dose_arm_1 | 9/13/2021                          | 0.4                             | 40                      | 50                      | 170                               | 1               | 0                  |        |                 |
| 41           | 24_weeks_post_dose_arm_1 | 12/6/2021                          | 0.4                             | 50                      | 0                       | 248                               | 1               | 0                  |        |                 |
| 41           | bv_24_weeks_post_d_arm_2 | 6/7/2022                           | 0.4                             | 200                     | 20                      | 993.5                             | 1               | 0                  | 10     | 10              |
| 41           | bv_48_weeks_post_d_arm_2 | 11/21/2022                         | 0.4                             | 450                     | 20                      | 2765                              | 2               | 0                  |        |                 |
| 30           | baseline_arm_1           | 3/24/2021                          | 0.4                             | 23                      | 7                       | 537                               | 1               | 0                  | 10     | 10              |
| 30           | 4_weeks_post_dose_arm_1  | 6/11/2021                          | 0.4                             | 220                     | 210                     | 53                                | 1               | 0                  | 16     | 10              |
| 30           | 12_weeks_post_dose_arm_1 | 8/3/2021                           | 0.4                             | PBMC LOST               | PBMC LOST               | 47                                | 1               | 0                  |        |                 |
| 30           | 24_weeks_post_dose_arm_1 | 10/29/2021                         | 0.4                             | 100                     | 40                      | 200                               | 1               | 0                  |        |                 |
| 30           | bv_48_weeks_post_d_arm_2 | 11/21/2021                         | 241                             | No PHA                  | No PHA                  | 13799                             | 1               | 0                  |        |                 |

|    |                          |            |       |             |             |          |   |   |        |          |
|----|--------------------------|------------|-------|-------------|-------------|----------|---|---|--------|----------|
| 30 | bv_4_weeks_post_do_arm_2 | 12/9/2021  | 0.4   | No PBMC     | No PBMC     | 2173.75  | 1 | 0 | 10     | 10       |
| 30 | bv_12_weeks_post_d_arm_2 | 2/28/2022  | 0.4   | 130         | 160         | 1829.75  | 1 | 0 | 10     | 10       |
| 30 | bv_24_weeks_post_d_arm_2 | 5/2/2022   | 3394  | 350         | 110         | 15505.25 | 1 | 1 | 55622  | 16.02333 |
| 52 | baseline_arm_1           | 2/5/2021   | 0.4   | 15          | 0           | 168      | 1 | 0 | 10     | 10       |
| 52 | 4_weeks_post_dose_arm_1  | 5/13/2021  | 0.4   | 247         | 43          | 41       | 1 | 0 | 14     | 10       |
| 52 | 12_weeks_post_dose_arm_1 | 7/8/2021   | 0.4   | PBMC LOST   | PBMC LOST   | 30       | 1 | 0 |        |          |
| 52 | 24_weeks_post_dose_arm_1 | 10/5/2021  | 0.4   | 20          | 0           | 41       | 1 | 0 |        |          |
| 52 | bv_4_weeks_post_do_arm_2 | 12/6/2021  | 0.4   | 80          | 20          | 206      | 1 | 0 | 10     | 10       |
| 52 | bv_12_weeks_post_d_arm_2 | 2/24/2022  | 0.4   | 140         | 250         | 18.75    | 1 | 0 |        |          |
| 52 | bv_48_weeks_post_d_arm_2 | 10/24/2022 | 471.8 | 110         | 120         |          | 2 | 1 |        |          |
| 29 | baseline_arm_1           | 3/10/2021  | 0.4   | 990         | 473         | 113      | 0 | 0 | 48.66  | 10       |
| 29 | 4_weeks_post_dose_arm_1  | 5/27/2021  | 14.3  | 597         | 173         | 6220     | 0 | 0 | 25     | 10       |
| 29 | 12_weeks_post_dose_arm_1 | 7/22/2021  | 8.43  | PBMC LOST   | PBMC LOST   | 2070     | 0 | 0 |        |          |
| 29 | 24_weeks_post_dose_arm_1 | 10/15/2021 | 6.2   | 60          | 0           | 926      | 0 | 0 |        |          |
| 29 | bv_4_weeks_post_do_arm_2 | 12/1/2021  | 7568  | 440         | 110         | 11404.75 | 0 | 0 | 582    | 38.275   |
| 29 | bv_12_weeks_post_d_arm_2 | 2/18/2022  | 14547 | 250         | 100         | 18521.75 | 1 | 1 |        |          |
| 29 | bv_24_weeks_post_d_arm_2 | 4/21/2022  | 9390  | 190         | 10          | 20689    | 1 | 1 | 619.5  | 167.6    |
| 58 | baseline_arm_1           | 1/27/2021  | 0.4   | No response | No response | 132      | 0 | 0 | 10     | 10       |
| 58 | 4_weeks_post_dose_arm_1  | 5/14/2021  | 1.04  | 443         | 130         | 1651     | 0 | 0 | 10     | 10       |
| 58 | 12_weeks_post_dose_arm_1 | 7/19/2021  | 0.96  | PBMC LOST   | PBMC LOST   | 14131    | 0 | 0 |        |          |
| 58 | 24_weeks_post_dose_arm_1 | 10/7/2021  | 0.75  | No PHA      | No PHA      | 297      | 0 | 0 |        |          |
| 58 | bv_4_weeks_post_do_arm_2 | 3/16/2022  | 1.51  | 450         | 100         | 9988.75  | 1 | 0 | 10     | 10       |
| 58 | bv_12_weeks_post_d_arm_2 | 5/9/2022   | 1.25  | 710         | 350         | 11853.5  | 1 | 0 |        |          |
| 58 | bv_24_weeks_post_d_arm_2 | 7/26/2022  | 185.3 | 230         | 70          | 13227    | 2 | 1 | 3975.5 | 5883     |
| 58 | bv_48_weeks_post_d_arm_2 | 2/6/2023   | 1.68  | 690         | 500         | 5185.25  | 2 | 1 |        |          |
| 59 | baseline_arm_1           | 2/16/2021  | 0.4   | No response | No response | 176      | 1 | 0 | 10     | 10       |
| 59 | 4_weeks_post_dose_arm_1  | 5/17/2021  | 3.89  | 220         | 103         | 8304     | 1 | 0 | 10     | 10       |
| 59 | 12_weeks_post_dose_arm_1 | 7/26/2021  | 2.05  | PBMC LOST   | PBMC LOST   | 1663     | 1 | 0 |        |          |
| 59 | 24_weeks_post_dose_arm_1 | 9/30/2021  | 1.05  | 0           | 0           | 158      | 1 | 0 |        |          |
| 59 | bv_12_weeks_post_d_arm_2 | 5/11/2022  | 0.52  | 310         | 770         | 3895     | 1 | 0 |        |          |
| 59 | bv_24_weeks_post_d_arm_2 | 8/22/2022  | 9.05  | 30          | 40          | 6563.25  | 2 | 0 | 10     | 10       |
| 59 | bv_48_weeks_post_d_arm_2 | 1/26/2023  | 2.75  | 40          | 140         | 9883     | 2 | 0 |        |          |
| 46 | baseline_arm_1           | 5/18/2021  | 0.4   | 0           | 0           | 134      | 0 | 0 | 13     | 10       |
| 46 | 4_weeks_post_dose_arm_1  | 8/25/2021  | 4.23  | 50          | 20          | 3411     | 0 | 0 | 114    | 27.88    |
| 46 | 12_weeks_post_dose_arm_1 | 10/21/2021 | 14.6  | 10          | 0           | 2525     | 0 | 0 |        |          |
| 46 | 24_weeks_post_dose_arm_1 | 1/11/2022  | 11.26 | 850         | 440         | 1873     | 0 | 0 |        |          |
| 46 | bv_4_weeks_post_do_arm_2 | 2/24/2022  | 3514  | 250         | 30          | 21456.75 | 1 | 0 | 1726.5 | 15.33333 |
| 46 | bv_12_weeks_post_d_arm_2 | 4/27/2022  | 170.5 | 2160        | 2010        | 3374     | 1 | 0 | 478.25 | 22       |
| 46 | bv_24_weeks_post_d_arm_2 | 7/19/2022  | 137.9 | 690         | 540         | 15169    | 1 | 0 | 77     | 10       |

|    |                          |            |       |             |             |          |   |   |          |          |
|----|--------------------------|------------|-------|-------------|-------------|----------|---|---|----------|----------|
| 46 | bv_48_weeks_post_d_arm_2 | 1/9/2023   | 148.9 | 160         | 160         | 15615.5  | 2 | 0 |          |          |
| 54 | baseline_arm_1           | 5/19/2021  | 0.4   | 190         | 80          | 1095     | 1 | 0 | 17       | 10       |
| 54 | 4_weeks_post_dose_arm_1  | 7/13/2021  | 4949  | No PHA      | No PHA      | 23288    | 1 | 0 | 1351.033 | 10       |
| 54 | 12_weeks_post_dose_arm_1 | 8/31/2021  | 2974  | 2780        | 150         | 17913    | 1 | 0 |          |          |
| 54 | 24_weeks_post_dose_arm_1 | 11/30/2021 | 1560  | 260         | 20          | 9045     | 1 | 0 |          |          |
| 54 | 48_weeks_post_dose_arm_1 | 5/12/2022  | 694   | No PHA      | No PHA      | 7990     | 1 | 0 | 68       | 21.08    |
| 54 | bv_4_weeks_post_do_arm_2 | 8/19/2022  | 810   | 2130        | 20          | 12063.25 | 1 | 0 | 88       | 10       |
| 54 | bv_12_weeks_post_d_arm_2 | 10/19/2022 |       | 3940        | 140         | 9913.5   | 1 | 0 |          |          |
| 54 | bv_24_weeks_post_d_arm_2 | 1/10/2023  | 534.5 | 7260        | 1130        | 11044    | 1 | 0 |          |          |
| 20 | baseline_arm_1           | 1/15/2021  | 0.4   | 0           | 7           | 17       | 0 | 0 |          |          |
| 20 | 4_weeks_post_dose_arm_1  | 9/2/2021   | 0.4   | 300         | 50          | 600      | 0 | 0 | 10       | 10       |
| 20 | 12_weeks_post_dose_arm_1 | 11/4/2021  | 92.5  | No PHA      | No PHA      | 23004    | 1 | 1 |          |          |
| 20 | 24_weeks_post_dose_arm_1 | 1/31/2022  | 1053  | 1490        | 860         | 24738    | 1 | 1 |          |          |
| 20 | 48_weeks_post_dose_arm_1 | 7/11/2022  | 30.4  | 500         | 150         | 16072.25 | 1 | 1 | 42.75    | 10       |
| 24 | baseline_arm_1           | 4/1/2021   | 0.4   | 140         | 30          | 200      | 1 | 0 | 10       | 10       |
| 24 | 4_weeks_post_dose_arm_1  | 5/25/2021  | 0.4   | 460         | 180         | 6301     | 1 | 0 | 10       | 10       |
| 24 | 12_weeks_post_dose_arm_1 | 7/21/2021  | 0.4   | PBMC LOST   | PBMC LOST   | 2675     | 1 | 0 |          |          |
| 24 | 24_weeks_post_dose_arm_1 | 10/11/2021 | 0.4   | 40          | 0           | 779      | 1 | 0 |          |          |
| 24 | 48_weeks_post_dose_arm_1 | 4/6/2022   | 0.4   | 110         | 0           | 4190.25  | 2 | 0 | 16       | 39.34667 |
| 44 | baseline_arm_1           | 5/27/2021  | 0.4   | 20          | 100         | 152      | 0 | 0 | 11       | 10       |
| 44 | 4_weeks_post_dose_arm_1  | 8/10/2021  | 13.84 | 10          | 30          | 3250     | 0 | 0 | 10       | 10       |
| 44 | 12_weeks_post_dose_arm_1 | 9/30/2021  | 5.01  | 10          | 0           | 1704     | 0 | 0 |          |          |
| 44 | 24_weeks_post_dose_arm_1 | 12/22/2021 | 16    | 40          | 20          | 455      | 0 | 0 |          |          |
| 44 | bv_4_weeks_post_do_arm_2 | 1/27/2022  | 1239  | 190         | 140         | 19668.5  | 0 | 0 | 89       | 24.67333 |
| 44 | bv_12_weeks_post_d_arm_2 | 3/24/2022  | 243.2 | 220         | 90          | 17624.5  | 0 | 0 | 30       | 10       |
| 44 | bv_24_weeks_post_d_arm_2 | 6/15/2022  | 66.4  | 20          | 70          | 11626.75 | 1 | 0 | 10       | 35.21667 |
| 44 | bv_48_weeks_post_d_arm_2 | 12/13/2022 | 22.8  | 250         | 100         | 10077.75 | 1 | 0 |          |          |
| 43 | baseline_arm_1           | 4/6/2021   | 0.4   | No response | No response | 114      | 0 | 0 | 16       | 10       |
| 43 | 4_weeks_post_dose_arm_1  | 5/27/2021  | 24.99 | 197         | 87          | 4732     | 0 | 0 | 10       | 10       |
| 43 | 12_weeks_post_dose_arm_1 | 7/26/2021  | 6.47  | PBMC LOST   | PBMC LOST   | 2411     | 0 | 0 |          |          |
| 43 | 24_weeks_post_dose_arm_1 | 10/19/2021 | 1.31  | 10          | 0           | 469      | 0 | 0 |          |          |
| 43 | bv_4_weeks_post_do_arm_2 | 11/22/2021 | 62.69 | 330         | 150         | 21294.75 | 0 | 0 | 67       | 10       |
| 43 | bv_12_weeks_post_d_arm_2 | 1/12/2022  | 11.04 | 100         | 220         | 19785.5  | 0 | 0 |          |          |
| 43 | bv_24_weeks_post_d_arm_2 | 4/11/2022  | 2.51  | 100         | 70          | 14809.25 | 0 | 0 | 18.46    | 10       |
| 43 | bv_48_weeks_post_d_arm_2 | 9/30/2022  |       | 20          | 0           |          | 0 | 0 |          |          |
| 27 | baseline_arm_1           | 3/29/2021  | 0.4   | 0           | 0           | 329      | 1 | 0 | 10       | 10       |
| 27 | 4_weeks_post_dose_arm_1  | 8/2/2021   | 44.63 | PBMC LOST   | PBMC LOST   | 17666    | 1 | 0 | 71.75    | 10       |
| 27 | 12_weeks_post_dose_arm_1 | 9/23/2021  | 150.6 | 180         | 10          | 15052    | 1 | 0 |          |          |
| 27 | 24_weeks_post_dose_arm_1 | 12/20/2021 | 38.7  | No PBMC     | No PBMC     | 6376.7   | 1 | 0 |          |          |

|    |                          |            |       |           |           |          |   |   |       |          |
|----|--------------------------|------------|-------|-----------|-----------|----------|---|---|-------|----------|
| 27 | 48_weeks_post_dose_arm_1 | 6/15/2022  | 14.7  | 100       | 0         | 6620.5   | 1 | 0 | 10    | 10       |
| 47 | baseline_arm_1           | 2/9/2021   | 0.4   | 0         | 0         | 134      | 0 | 0 | 19    | 10       |
| 47 | 4_weeks_post_dose_arm_1  | 8/11/2021  | 463.9 | No PHA    | No PHA    | 5118     | 0 | 0 | 10    | 10       |
| 47 | 12_weeks_post_dose_arm_1 | 10/6/2021  | 69.1  | No PHA    | No PHA    | 5984     | 0 | 0 |       |          |
| 47 | bv_4_weeks_post_do_arm_2 | 12/29/2021 | 18.6  | 440       | 370       | 14503    | 0 | 0 |       |          |
| 47 | bv_12_weeks_post_d_arm_2 | 3/8/2022   | 8.76  | 840       | 400       | 14373.75 | 0 | 0 | 10    | 10       |
| 47 | bv_24_weeks_post_d_arm_2 | 6/7/2022   | 5.99  | 630       | 220       | 12115.5  | 0 | 0 |       |          |
| 47 | bv_48_weeks_post_d_arm_2 | 12/21/2022 | 4.8   | 1390      | 1030      | 15243    | 1 | 0 |       |          |
| 18 | baseline_arm_1           | 4/13/2021  | 0.4   | No PBMC   | No PBMC   | 147      | 0 | 0 | 10    | 10       |
| 18 | 4_weeks_post_dose_arm_1  | 6/8/2021   | 102.2 | 893       | 137       | 3583     | 0 | 0 | 10    | 10       |
| 18 | 12_weeks_post_dose_arm_1 | 8/6/2021   | 21.03 | 200       | 110       | 2697     | 0 | 0 |       |          |
| 18 | 24_weeks_post_dose_arm_1 | 11/4/2021  | 3.95  | 100       | 40        | 434      | 0 | 0 |       |          |
| 18 | bv_4_weeks_post_do_arm_2 | 1/25/2022  | 224   | 1960      | 660       | 17246.5  | 1 | 1 | 614.5 | 168      |
| 18 | bv_12_weeks_post_d_arm_2 | 3/28/2022  | 5755  | 4170      | 1560      | 15840.5  | 1 | 1 |       |          |
| 55 | baseline_arm_1           | 3/31/2021  | 0.4   | 0         | 13        | 293      | 1 | 0 | 10    | 10       |
| 55 | 4_weeks_post_dose_arm_1  | 6/8/2021   | 885.9 | 1040      | 380       | 4446     | 1 | 0 | 10    | 10       |
| 55 | 12_weeks_post_dose_arm_1 | 7/29/2021  | 181.8 | PBMC LOST | PBMC LOST | 1475     | 1 | 0 |       |          |
| 55 | 24_weeks_post_dose_arm_1 | 10/21/2021 | 44.7  | 410       | 180       | 338      | 1 | 0 |       |          |
| 55 | bv_4_weeks_post_do_arm_2 | 1/28/2022  | 213.2 | 610       | 60        | 32900.75 | 2 | 0 |       |          |
| 55 | bv_12_weeks_post_d_arm_2 | 3/30/2022  | 14059 | 1060      | 190       | 28555.25 | 2 | 0 | 10    | 62.58    |
| 55 | bv_24_weeks_post_d_arm_2 | 6/23/2022  | 3431  | 260       | 30        | 22020.5  | 2 | 0 | 10    | 10       |
| 55 | bv_48_weeks_post_d_arm_2 | 12/5/2022  | 1202  | 1150      | 520       | 23499.25 | 2 | 0 |       |          |
| 36 | baseline_arm_1           | 3/3/2021   | 0.4   | 0         | 0         | 421      | 1 | 0 | 10    | 10       |
| 36 | 4_weeks_post_dose_arm_1  | 7/8/2021   | 0.4   | 980       | 40        | 235      | 1 | 0 | 10    | 10       |
| 36 | bv_4_weeks_post_do_arm_2 | 9/14/2021  | 0.4   | 1800      | 760       | 13008.5  | 1 | 0 | 10    | 10       |
| 36 | bv_12_weeks_post_d_arm_2 | 11/19/2021 | 0.4   | 440       | 110       | 6580.75  | 1 | 0 |       |          |
| 36 | bv_24_weeks_post_d_arm_2 | 2/28/2022  | 0.4   | 80        | 0         | 13559.75 | 1 | 0 | 10    | 10       |
| 36 | bv_48_weeks_post_d_arm_2 | 7/26/2022  | 0.4   | 180       | 10        | 11459    | 2 | 0 |       |          |
| 19 | baseline_arm_1           | 3/25/2021  | 0.4   | 60        | 60        | 40       | 0 | 0 | 10    | 10       |
| 19 | 4_weeks_post_dose_arm_1  | 8/27/2021  | 632.8 | 240       | 220       | 10686    | 0 | 0 | 1412  | 24.61    |
| 19 | 12_weeks_post_dose_arm_1 | 10/22/2021 | 194   | 140       | 50        | 505      | 0 | 0 |       |          |
| 19 | 24_weeks_post_dose_arm_1 | 1/28/2022  | 9148  | 220       | 30        | 21917    | 1 | 1 |       |          |
| 19 | 48_weeks_post_dose_arm_1 | 7/1/2022   | 1741  | 330       | 210       | 20232.75 | 1 | 1 | 166   | 63.53333 |
| 48 | baseline_arm_1           | 6/23/2021  | 0.4   | 710       | 0         | 103      | 0 | 0 | 10    | 10       |
| 48 | 4_weeks_post_dose_arm_1  | 8/16/2021  | 0.4   | 950       | 390       | 302      | 0 | 0 | 10    | 10       |
| 48 | 12_weeks_post_dose_arm_1 | 10/14/2021 | 0.4   | 1560      | 180       | 270      | 0 | 0 |       |          |
| 48 | 24_weeks_post_dose_arm_1 | 1/20/2022  | 2.9   | 810       | 250       | 608      | 1 | 0 |       |          |
| 48 | bv_4_weeks_post_do_arm_2 | 2/24/2022  | 1.97  | 100       | 20        | 6856.25  | 1 | 0 | 10    | 10       |
| 48 | bv_12_weeks_post_d_arm_2 | 4/21/2022  | 0.4   | 5310      | 1980      | 19408    | 1 | 0 |       |          |

|    |                          |            |       |         |         |            |   |   |        |          |
|----|--------------------------|------------|-------|---------|---------|------------|---|---|--------|----------|
| 48 | bv_24_weeks_post_d_arm_2 | 7/14/2022  | 31    | 20      | 260     | 7183.75    | 1 | 0 | 17     | 86.24667 |
| 48 | bv_48_weeks_post_d_arm_2 | 1/6/2023   | 26.64 | 810     | 890     | 10537.5    | 1 | 0 |        |          |
| 49 | baseline_arm_1           | 6/24/2021  | 0.4   | 30      | 40      | 213        | 1 | 0 | 14     | 10       |
| 49 | 4_weeks_post_dose_arm_1  | 8/17/2021  | 0.4   | 180     | 30      | 146        | 1 | 0 | 10     | 10       |
| 49 | 12_weeks_post_dose_arm_1 | 10/11/2021 | 0.4   | 70      | 20      | 145        | 1 | 0 |        |          |
| 49 | 24_weeks_post_dose_arm_1 | 1/12/2022  | 0.4   | No PHA  | No PHA  | 279        | 1 | 0 |        |          |
| 49 | bv_4_weeks_post_do_arm_2 | 2/28/2022  | 0.4   | 260     | 20      | 1764.58333 | 1 | 0 | 10     | 10       |
| 49 | bv_12_weeks_post_d_arm_2 | 5/6/2022   | 0.4   | 2700    | 1090    | 2004.33333 | 1 | 0 |        |          |
| 49 | bv_24_weeks_post_d_arm_2 | 7/18/2022  | 0.4   | 120     | 0       | 1687.08333 | 2 | 0 | 69.38  | 34.4     |
| 49 | bv_48_weeks_post_d_arm_2 | 1/9/2023   | 0.4   | 2130    | 1650    | 3113.75    | 2 | 0 |        |          |
| 31 | baseline_arm_1           | 4/8/2021   | 0.4   | 10      | 50      | 133        | 0 | 0 |        |          |
| 31 | 4_weeks_post_dose_arm_1  | 6/30/2021  | 0.4   | 2280    | 480     | 228        | 0 | 0 | 10     | 10       |
| 31 | 12_weeks_post_dose_arm_1 | 8/31/2021  | 0.4   | 50      | 0       | 68         | 0 | 0 |        |          |
| 31 | bv_48_weeks_post_d_arm_2 | 11/10/2021 |       | 360     | 70      |            | 0 | 0 |        |          |
| 31 | 24_weeks_post_dose_arm_1 | 11/23/2021 | 0.4   | 70      | 10      | 38         | 0 | 0 |        |          |
| 31 | bv_4_weeks_post_do_arm_2 | 1/3/2022   | 0.4   | 900     | 140     | 93         | 0 | 0 |        |          |
| 31 | bv_12_weeks_post_d_arm_2 | 3/4/2022   | 0.4   | 180     | 90      | 52         | 0 | 0 | 10     | 10       |
| 31 | bv_24_weeks_post_d_arm_2 | 6/2/2022   | 0.4   | 470     | 80      | 272        | 1 | 0 | 10     | 10       |
| 25 | baseline_arm_1           | 6/30/2021  | 0.4   | 0       | 0       | 107        | 0 | 0 | 10     | 14.42    |
| 25 | 4_weeks_post_dose_arm_1  | 11/23/2021 | 778.8 | 30      | 50      | 23705      | 0 | 0 | 400    | 10       |
| 25 | 12_weeks_post_dose_arm_1 | 2/24/2022  | 111   | 100     | 50      | 3274       | 1 | 0 |        |          |
| 25 | 24_weeks_post_dose_arm_1 | 4/22/2022  | 29.73 | 1520    | 2910    | 1820       | 1 | 0 | 10     | 10       |
| 25 | 48_weeks_post_dose_arm_1 | 9/28/2022  |       | No PHA  | No PHA  | 7983.58333 | 1 | 0 | 10     | 829      |
| 3  | baseline_arm_1           | 6/30/2021  | 0.4   | 1610    | 150     | 1820       | 1 | 0 | 10     | 10       |
| 3  | 4_weeks_post_dose_arm_1  | 8/31/2021  | 206.9 | 1350    | 160     | 4536       | 1 | 0 | 53     | 10       |
| 50 | baseline_arm_1           | 2/22/2021  | 0.4   | 1397    | 53      | 605        | 1 | 0 |        |          |
| 50 | 4_weeks_post_dose_arm_1  | 7/1/2021   | 5628  | No PBMC | No PBMC | 29258      | 1 | 0 | 3663.5 | 47.52    |
| 50 | 12_weeks_post_dose_arm_1 | 8/27/2021  | 818.4 | 810     | 10      | 14881      | 1 | 0 |        |          |
| 50 | 24_weeks_post_dose_arm_1 | 11/22/2021 | 186.2 | 140     | 60      | 6576       | 1 | 0 |        |          |
| 50 | bv_4_weeks_post_do_arm_2 | 1/25/2022  | 25000 | 360     | 60      | 28123      | 1 | 0 |        |          |
| 50 | bv_12_weeks_post_d_arm_2 | 3/22/2022  | 25000 | 650     | 180     | 29725      | 1 | 0 | 9839   | 885.6    |
| 50 | bv_24_weeks_post_d_arm_2 | 6/13/2022  | 17782 | 250     | 60      | 26139      | 1 | 0 | 4164   | 973      |
| 50 | bv_48_weeks_post_d_arm_2 | 12/1/2022  | 7376  | 1030    | 690     |            | 1 | 0 |        |          |
| 23 | baseline_arm_1           | 3/8/2021   | 0.4   | 0       | 0       | 79         | 0 | 0 | 10     | 10       |
| 23 | 4_weeks_post_dose_arm_1  | 7/1/2021   | 0.4   | 170     | 90      | 528        | 0 | 0 | 10     | 10       |
| 23 | 12_weeks_post_dose_arm_1 | 8/24/2021  | 0.4   | 30      | 130     | 430        | 0 | 0 |        |          |
| 23 | 24_weeks_post_dose_arm_1 | 12/1/2021  | 0.4   | 110     | 110     | 88.5       | 0 | 0 |        |          |
| 23 | bv_4_weeks_post_do_arm_2 | 3/18/2022  | 0.4   | 470     | 120     | 285.5      | 0 | 0 | 10     | 10       |
| 23 | bv_12_weeks_post_d_arm_2 | 5/3/2022   | 0.4   | 5820    | 2470    | 151.5      | 0 | 0 | 10     | 10       |

|    |                          |            |       |             |             |            |   |   |          |          |
|----|--------------------------|------------|-------|-------------|-------------|------------|---|---|----------|----------|
| 45 | baseline_arm_1           | 4/8/2021   | 31.17 | 10          | 10          | 13264      | 1 | 0 | 461.55   | 39.98    |
| 45 | 4_weeks_post_dose_arm_1  | 7/2/2021   | 505.2 | 210         | 23          | 25114      | 1 | 0 | 2117     | 10       |
| 45 | 12_weeks_post_dose_arm_1 | 8/26/2021  | 469.2 | 3800        | 370         | 21775      | 1 | 0 |          |          |
| 45 | 24_weeks_post_dose_arm_1 | 11/18/2021 | 342.5 | 1320        | 140         | 12095      | 1 | 0 |          |          |
| 45 | bv_4_weeks_post_do_arm_2 | 1/7/2022   | 6643  | 5180        | 390         | 22733.8333 | 2 | 0 | 1093     | 30       |
| 45 | bv_12_weeks_post_d_arm_2 | 3/4/2022   | 6919  | 3300        | 630         | 26024.5833 | 2 | 0 | 1249     | 144.1    |
| 45 | bv_24_weeks_post_d_arm_2 | 5/20/2022  | 5282  | 2930        | 180         | 25603.0833 | 2 | 0 | 879.4667 | 140.9    |
| 45 | bv_48_weeks_post_d_arm_2 | 11/11/2022 | 6101  | 4930        | 160         | 24449.0833 | 2 | 0 |          |          |
| 60 | baseline_arm_1           | 4/19/2021  | 0.4   | 0           | 10          | 775        | 1 | 0 | 10       | 10       |
| 60 | 4_weeks_post_dose_arm_1  | 7/6/2021   | 2.57  | No response | No response | 25839      | 1 | 0 | 315.5    | 20       |
| 60 | 12_weeks_post_dose_arm_1 | 8/27/2021  | 0.5   | 0           | 0           | 20999      | 1 | 0 |          |          |
| 60 | 24_weeks_post_dose_arm_1 | 11/23/2021 | 2.51  | 80          | 110         | 18668      | 1 | 0 |          |          |
| 60 | bv_4_weeks_post_do_arm_2 | 5/25/2022  | 0.94  | 5100        | 2600        | 11981.25   | 1 | 0 | 10       | 10       |
| 60 | bv_12_weeks_post_d_arm_2 | 7/19/2022  | 0.64  | 630         | 220         | 7030.75    | 1 | 0 |          |          |
| 60 | bv_24_weeks_post_d_arm_2 | 10/17/2022 |       | 130         | 190         | 3021.25    | 1 | 0 | 10       | 10       |
| 60 | bv_48_weeks_post_d_arm_2 | 4/10/2023  | 0.54  | 1460        | 480         | 2717       | 1 | 0 |          |          |
| 56 | baseline_arm_1           | 3/31/2021  | 0.4   | 57          | 10          | 178        | 1 | 0 |          |          |
| 56 | 4_weeks_post_dose_arm_1  | 7/12/2021  | 35.13 | 280         | 30          | 20207      | 1 | 0 | 35.255   | 10       |
| 56 | 12_weeks_post_dose_arm_1 | 9/8/2021   | 20.91 | 100         | 0           | 8618       | 1 | 0 |          |          |
| 56 | 24_weeks_post_dose_arm_1 | 12/2/2021  | 15.28 | 320         | 120         | 270        | 1 | 0 |          |          |
| 56 | bv_4_weeks_post_do_arm_2 | 3/3/2022   | 4690  | 300         | 100         | 17819      | 1 | 0 |          |          |
| 56 | bv_24_weeks_post_d_arm_2 | 7/22/2022  | 1929  | 170         | 0           | 13866      | 2 | 0 | 126      | 44.83    |
| 56 | bv_48_weeks_post_d_arm_2 | 2/1/2023   | 962.9 | 590         | 230         |            | 2 | 0 |          |          |
| 17 | baseline_arm_1           | 3/5/2021   | 101.6 | 57          | 13          | 1883       | 1 | 0 | 73       | 10       |
| 17 | 4_weeks_post_dose_arm_1  | 8/23/2021  | 13077 | 60          | 0           | 14089      | 1 | 0 | 4358.5   | 192.5    |
| 17 | bv_4_weeks_post_do_arm_2 | 3/10/2022  | 8737  | 280         | 110         | 21247      | 1 | 0 | 2582     | 175.9333 |
| 17 | bv_12_weeks_post_d_arm_2 | 4/29/2022  | 4774  | 840         | 600         | 23670      | 1 | 0 | 1495     | 63       |
| 53 | baseline_arm_1           | 1/27/2021  | 0.4   | 97          | 0           | 116        | 0 | 0 | 10       | 10       |
| 53 | 4_weeks_post_dose_arm_1  | 10/5/2021  | 0.4   | 0           | 0           | 61         | 0 | 0 | 10       | 10       |
| 53 | 12_weeks_post_dose_arm_1 | 12/10/2021 | 0.4   | 40          | 20          | 119        | 0 | 0 |          |          |
| 53 | 24_weeks_post_dose_arm_1 | 3/8/2022   | 0.4   | 400         | 220         | 56         | 0 | 0 |          |          |
| 53 | bv_4_weeks_post_do_arm_2 | 5/2/2022   | 0.4   | 590         | 340         | 174.583333 | 1 | 0 | 10       | 10       |
| 53 | bv_12_weeks_post_d_arm_2 | 6/23/2022  | 0.4   | 530         | 300         | 1015.08333 | 1 | 0 | 10       | 10       |
| 53 | bv_24_weeks_post_d_arm_2 | 9/28/2022  | 4270  | No PHA      | No PHA      | 21259.5833 | 1 | 0 | 1227.65  | 185.8    |
| 53 | bv_48_weeks_post_d_arm_2 | 3/6/2023   | 2296  |             |             |            | 1 | 0 |          |          |
| 26 | baseline_arm_1           | 9/9/2021   | 0.4   | 0           | 0           | 42         | 0 | 0 | 10       | 10       |
| 26 | 4_weeks_post_dose_arm_1  | 11/12/2021 | 0.4   | 10          | 0           | 728        | 0 | 0 | 10       | 10       |
| 26 | 12_weeks_post_dose_arm_1 | 1/21/2022  | 168.5 | 1580        | 220         | 17310      | 1 | 1 |          |          |
| 26 | 24_weeks_post_dose_arm_1 | 4/1/2022   | 6454  | 950         | 530         | 16835      | 1 | 1 | 282.9    | 193.8    |

|    |                          |            |       |              |              |            |   |   |       |          |
|----|--------------------------|------------|-------|--------------|--------------|------------|---|---|-------|----------|
| 26 | 48_weeks_post_dose_arm_1 | 9/19/2022  | 1749  | 10           | 10           |            | 1 | 1 |       |          |
| 11 | baseline_arm_1           | 9/23/2021  | 1.25  | No PBMC      | No PBMC      | 434.75     | 1 | 0 | 10    | 10       |
| 11 | 4_weeks_post_dose_arm_1  | 11/18/2021 | 268.2 | No PBMC      | No PBMC      | 8233       | 1 | 0 | 589   | 10       |
| 11 | 24_weeks_post_dose_arm_1 | 4/7/2022   | 84.28 | No PBMC      | No PBMC      | 3514       | 2 | 0 |       |          |
| 22 | baseline_arm_1           | 2/22/2021  | 0.4   | No response  | No response  | 58         | 0 | 0 | 10    | 28.49667 |
| 22 | 4_weeks_post_dose_arm_1  | 9/28/2021  | 327.9 | No PHA       | No PHA       | 759        | 0 | 0 | 240   | 10       |
| 22 | 12_weeks_post_dose_arm_1 | 11/22/2021 | 98.15 | No PBMC      | No PBMC      | 12108      | 0 | 0 |       |          |
| 22 | 24_weeks_post_dose_arm_1 | 2/22/2022  | 40.8  | 0            | 30           | 10839.8333 | 0 | 0 |       |          |
| 22 | 48_weeks_post_dose_arm_1 | 7/28/2022  | 27.72 | 180          | 20           | 8087.58333 | 1 | 0 | 10    | 10       |
| 21 | baseline_arm_1           | 3/31/2021  | 0.4   | 0            | 7            | 48         | 1 | 0 | 10    | 15.25    |
| 21 | 4_weeks_post_dose_arm_1  | 10/6/2021  | 36.9  | 90           | 30           | 4674       | 2 | 0 | 327   | 10       |
| 21 | 12_weeks_post_dose_arm_1 | 12/21/2021 | 8.57  | 150          | 20           | 2619       | 2 | 0 |       |          |
| 21 | 24_weeks_post_dose_arm_1 | 2/28/2022  | 3.83  | 390          | 80           | 8757.83333 | 2 | 0 |       |          |
| 21 | 48_weeks_post_dose_arm_1 | 8/17/2022  | 2.4   | 30           | 30           | 2455.58333 | 2 | 0 | 10    | 10       |
| 5  | baseline_arm_1           | 11/4/2021  | 0.4   | 10           | 0            | 152        | 0 | 0 | 10    | 10       |
| 5  | 4_weeks_post_dose_arm_1  | 12/29/2021 | 16.1  | 0            | 0            | 9464       | 0 | 0 | 30    | 10       |
| 5  | 12_weeks_post_dose_arm_1 | 2/23/2022  | 5.02  | 0            | 0            | 2530       | 0 | 0 |       |          |
| 16 | baseline_arm_1           | 5/4/2021   | 0.4   | 10           | 0            | 40         | 0 | 0 | 10    | 10       |
| 16 | 4_weeks_post_dose_arm_1  | 7/8/2021   | 0.4   | 380          | 110          | 42         | 0 | 0 | 16    | 10       |
| 16 | 12_weeks_post_dose_arm_1 | 9/8/2021   | 0.4   | 250          | 140          | 37         | 0 | 0 |       |          |
| 16 | bv_4_weeks_post_do_arm_2 | 10/14/2021 | 0.4   | 1520         | 100          | 37         | 0 | 0 | 10    | 10       |
| 16 | bv_12_weeks_post_d_arm_2 | 12/15/2021 | 0.4   | 700          | 90           | 340.833333 | 0 | 0 |       |          |
| 16 | bv_24_weeks_post_d_arm_2 | 3/14/2022  | 0.4   | 3530         | 700          | 280.833333 | 0 | 0 | 15    | 10       |
| 10 | baseline_arm_1           | 6/4/2021   | 0.4   | 40           | 20           | 82         | 0 | 0 | 10    | 10       |
| 10 | 4_weeks_post_dose_arm_1  | 7/26/2021  | 0.4   | 290          | 40           | 78         | 0 | 0 | 10    | 10       |
| 10 | 12_weeks_post_dose_arm_1 | 9/17/2021  | 0.4   | 310          | 40           | 68         | 0 | 0 |       |          |
| 10 | 24_weeks_post_dose_arm_1 | 12/7/2021  | 5945  | 2140         | 160          | 24293      | 1 | 1 |       |          |
| 13 | baseline_arm_1           | 6/11/2021  | 0.4   | 30           | 0            | 174.8      | 1 | 0 | 89.67 | 10       |
| 13 | 4_weeks_post_dose_arm_1  | 8/4/2021   | 0.4   | No PHA       | No PHA       | 569.6      | 1 | 0 | 10    | 10       |
| 13 | 12_weeks_post_dose_arm_1 | 9/28/2021  | 0.4   | 150          | 40           | 408.4      | 1 | 0 |       |          |
| 13 | 24_weeks_post_dose_arm_1 | 1/10/2022  | 1.21  | 700          | 270          | 157.9      | 1 | 0 |       |          |
| 51 | baseline_arm_1           | 6/14/2021  | 0.4   | 0            | 0            | 46         | 0 | 0 | 10    | 10       |
| 51 | 4_weeks_post_dose_arm_1  | 8/3/2021   | 0.4   | 120          | 0            | 367        | 0 | 0 | 10    | 10       |
| 51 | 12_weeks_post_dose_arm_1 | 10/13/2021 | 0.4   | 430          | 30           | 118        | 0 | 0 |       |          |
| 51 | 24_weeks_post_dose_arm_1 | 1/11/2022  | 0.4   | 170          | 30           | 30         | 0 | 0 |       |          |
| 51 | bv_4_weeks_post_do_arm_2 | 2/8/2022   | 0.4   | 1840         | 10           | 2971.58333 | 0 | 0 | 10    | 10       |
| 51 | bv_12_weeks_post_d_arm_2 | 4/20/2022  | 0.4   | 2610         | 460          | 2241.08333 | 0 | 0 |       |          |
| 51 | bv_24_weeks_post_d_arm_2 | 7/19/2022  | 0.4   | 150          | 30           | 3611.08333 | 1 | 0 | 15    | 24.51    |
| 51 | bv_48_weeks_post_d_arm_2 | 1/17/2023  | 0.4   | Low PHA, Hig | Low PHA, Hig | 5569       | 1 | 0 |       |          |

|    |                          |            |       |        |               |            |   |   |       |       |
|----|--------------------------|------------|-------|--------|---------------|------------|---|---|-------|-------|
| 2  | baseline_arm_1           | 6/17/2021  | 0.4   | 0      | 0             | 546        | 1 | 0 | 10    | 10    |
| 2  | 4_weeks_post_dose_arm_1  | 8/18/2021  | 0.4   | 850    | 30            | 38         | 1 | 0 | 10    | 10    |
| 14 | baseline_arm_1           | 6/22/2021  | 0.4   | 0      | 10            | 380        | 1 | 0 | 10    | 10    |
| 14 | 4_weeks_post_dose_arm_1  | 8/24/2021  | 0.45  | 200    | 30            | 452.9      | 1 | 0 | 10    | 10    |
| 14 | 12_weeks_post_dose_arm_1 | 10/28/2021 | 0.4   | No PHA | No PHA        | 184.4      | 1 | 0 |       |       |
| 14 | 24_weeks_post_dose_arm_1 | 3/29/2022  | 0.4   | 3250   | 4320          | 377.6      | 2 | 0 |       |       |
| 37 | baseline_arm_1           | 6/22/2021  | 0.4   | 0      | 0             | 69         | 0 | 0 | 10    | 10    |
| 37 | 4_weeks_post_dose_arm_1  | 9/7/2021   | 139   | 30     | 0             | 20418      | 0 | 0 | 60    | 10    |
| 37 | 12_weeks_post_dose_arm_1 | 11/9/2021  | 158   | 30     | Plating error | 10995.5833 | 0 | 0 |       |       |
| 37 | 24_weeks_post_dose_arm_1 | 2/8/2022   | 73.86 | 10     | 30            | 5337.4     | 0 | 0 |       |       |
| 37 | 48_weeks_post_dose_arm_1 | 9/27/2022  | 2131  | 80     | 10            | 10597.3333 | 1 | 0 | 311.7 | 32.1  |
| 4  | baseline_arm_1           | 7/6/2021   | 0.4   | 0      | 0             | 56         | 0 | 0 | 10    | 10    |
| 4  | 4_weeks_post_dose_arm_1  | 8/25/2021  | 0.4   | 140    | 20            | 559        | 0 | 0 | 31.65 | 10    |
| 4  | 12_weeks_post_dose_arm_1 | 10/19/2021 | 0.4   | 300    | 100           | 4562       | 0 | 0 |       |       |
| 35 | baseline_arm_1           | 7/13/2021  | 0.4   | 20     | 0             | 348        | 1 | 0 | 10    | 10    |
| 35 | 4_weeks_post_dose_arm_1  | 9/13/2021  | 1.76  | 410    | 50            | 5288       | 1 | 0 | 71    | 10    |
| 35 | 12_weeks_post_dose_arm_1 | 11/16/2021 | 1.04  | 220    | 40            | 2012       | 1 | 0 |       |       |
| 35 | 24_weeks_post_dose_arm_1 | 2/8/2022   | 0.54  | 270    | 10            | 1345.6     | 2 | 0 |       |       |
| 35 | 48_weeks_post_dose_arm_1 | 9/19/2022  | 0.4   | 40     | 10            | 502        | 2 | 0 | 10    | 10    |
| 42 | baseline_arm_1           | 8/3/2021   | 0.4   | 0      | 0             | 46         | 0 | 0 | 10    | 10    |
| 42 | 4_weeks_post_dose_arm_1  | 10/11/2021 | 136   | 90     | 10            | 74         | 0 | 0 | 161   | 10    |
| 42 | 12_weeks_post_dose_arm_1 | 11/17/2021 | 83.11 | 130    | 30            | 12773      | 0 | 0 |       |       |
| 42 | bv_4_weeks_post_do_arm_2 | 3/14/2022  | 1942  | 1040   | 330           | 13087.8333 | 0 | 0 | 248   | 18    |
| 42 | bv_12_weeks_post_d_arm_2 | 5/11/2022  | 731.9 | 400    | 110           | 9428.83333 | 0 | 0 |       |       |
| 42 | bv_24_weeks_post_d_arm_2 | 7/19/2022  | 130.5 | 220    | 10            | 5750.33333 | 0 | 0 | 15    | 10    |
| 42 | bv_48_weeks_post_d_arm_2 | 1/24/2023  | 24.8  | 170    | 40            | 10453      | 0 | 0 |       |       |
| 32 | baseline_arm_1           | 8/25/2021  | 0.4   | 10     | 0             | 108        | 0 | 0 | 10    | 10    |
| 32 | 4_weeks_post_dose_arm_1  | 10/19/2021 | 0.4   | 20     | 80            | 116        | 0 | 0 | 10    | 10.69 |
| 32 | 12_weeks_post_dose_arm_1 | 12/17/2021 | 0.4   | 130    | 40            | 117        | 0 | 0 |       |       |
| 32 | 24_weeks_post_dose_arm_1 | 3/18/2022  | 0.4   | 0      | 0             | 148        | 0 | 0 |       |       |
| 32 | bv_4_weeks_post_do_arm_2 | 5/10/2022  | 0.4   | 180    | 40            | 39         | 0 | 0 | 10    | 10    |
| 32 | bv_12_weeks_post_d_arm_2 | 7/8/2022   | 0.4   | 340    | 350           | 36         | 0 | 0 |       |       |
| 32 | bv_24_weeks_post_d_arm_2 | 9/27/2022  | 0.4   | 250    | 70            | 30         | 1 | 0 | 10    | 10    |
| 6  | baseline_arm_1           | 5/6/2021   | 0.4   | 0      | 0             | 61         | 0 | 0 | 22.4  | 10    |
| 6  | 4_weeks_post_dose_arm_1  | 6/22/2021  |       | 190    | 20            | 64         | 0 | 0 | 50    | 10    |
| 6  | 12_weeks_post_dose_arm_1 | 8/24/2021  | 0.4   | 120    | 10            | 53         | 0 | 0 |       |       |
| 39 | baseline_arm_1           | 9/7/2021   | 0.4   | 20     | 0             | 77         | 0 | 0 | 10    | 10    |
| 39 | 4_weeks_post_dose_arm_1  | 10/26/2021 | 1.33  | 610    | 110           | 4148.4     | 0 | 0 | 10    | 10    |
| 39 | 12_weeks_post_dose_arm_1 | 12/28/2021 | 6.45  | 550    | 10            | 896        | 0 | 0 |       |       |



|    |                          |            |       |              |              |            |   |   |          |       |
|----|--------------------------|------------|-------|--------------|--------------|------------|---|---|----------|-------|
| 39 | bv_4_weeks_post_do_arm_2 | 2/7/2022   | 1827  | 2820         | 10           | 150        | 0 | 0 | 314.2333 | 23.87 |
| 39 | bv_12_weeks_post_d_arm_2 | 3/24/2022  | 884   | 1870         | 1770         | 12842      | 0 | 0 |          |       |
| 39 | bv_24_weeks_post_d_arm_2 | 7/5/2022   | 550.4 | 2150         | 190          | 14102      | 1 | 0 | 85.06    | 46.75 |
| 39 | bv_48_weeks_post_d_arm_2 | 1/17/2023  | 136   | Low PHA, Hig | Low PHA, Hig | 12637      | 1 | 0 |          |       |
| 33 | baseline_arm_1           | 9/8/2021   | 0.4   | 20           | 10           | 97         | 0 | 0 | 10       | 10    |
| 33 | 4_weeks_post_dose_arm_1  | 11/8/2021  | 0.4   | 50           | 20           | 962        | 0 | 0 | 10       | 10    |
| 33 | 12_weeks_post_dose_arm_1 | 1/12/2022  | 119.7 | 410          | 30           | 1926       | 1 | 1 |          |       |
| 33 | 24_weeks_post_dose_arm_1 | 5/3/2022   | 1029  | 150          | 120          | 26083      | 1 | 1 |          |       |
| 33 | 48_weeks_post_dose_arm_1 | 11/2/2022  |       | 180          | 170          | 806        | 1 | 1 | 30.61    | 10    |
| 34 | baseline_arm_1           | 9/15/2021  | 0.4   | 10           | 0            | 150        | 0 | 0 | 63.31    | 10    |
| 34 | 24_weeks_post_dose_arm_1 | 6/24/2022  | 5086  | 190          | 50           | 11173.4167 | 1 | 1 |          |       |
| 34 | 48_weeks_post_dose_arm_1 | 12/20/2022 |       | Low PHA, Hig | Low PHA, Hig | 12848      | 1 | 1 |          |       |
| 12 | baseline_arm_1           | 5/7/2021   | 1.33  | 40           | 0            | 410        | 1 | 0 | 10       | 11    |
| 12 | 4_weeks_post_dose_arm_1  | 7/13/2021  | 31.84 | 510          | 30           | 1000       | 1 | 0 | 66       | 10    |
| 12 | 12_weeks_post_dose_arm_1 | 9/15/2021  | 33.2  | 110          | 30           | 1123       | 1 | 0 |          |       |
| 12 | 24_weeks_post_dose_arm_1 | 12/8/2021  | 31.36 | 2490         | 200          | 1114       | 1 | 0 |          |       |
| 38 | baseline_arm_1           | 5/7/2021   | 0.4   | 0            | 0            | 48         | 0 | 0 |          |       |
| 38 | 4_weeks_post_dose_arm_1  | 7/13/2021  | 0.4   | 10           | 0            | 46         | 0 | 0 | 10       | 10    |
| 38 | 12_weeks_post_dose_arm_1 | 8/31/2021  | 0.4   | 0            | 0            | 62         | 0 | 0 |          |       |
| 38 | bv_24_weeks_post_d_arm_2 | 3/1/2022   | 0.4   | 0            | 0            | 60         | 0 | 0 | 20       | 10    |
| 38 | bv_48_weeks_post_d_arm_2 | 9/6/2022   | 0.4   | No PHA       | No PHA       | 3043       | 0 | 0 | 10       | 10    |
| 8  | baseline_arm_1           | 5/11/2021  | 0.4   | 0            | 0            | 39         | 0 | 0 | 23.91    | 10    |
| 8  | 4_weeks_post_dose_arm_1  | 6/28/2021  | 0.4   | 30           | 0            | 88         | 0 | 0 | 10       | 10    |
| 8  | 12_weeks_post_dose_arm_1 | 8/25/2021  | 0.4   | 50           | 0            | 44         | 0 | 0 |          |       |
| 8  | bv_4_weeks_post_do_arm_2 | 10/27/2021 | 0.4   | 300          | 10           | 48         | 0 | 0 | 10       | 10    |
| 9  | baseline_arm_1           | 5/11/2021  | 0.4   | 0            | 0            | 75         | 0 | 0 | 10       | 10    |
| 9  | 4_weeks_post_dose_arm_1  | 8/4/2021   | 0.4   | 60           | 0            | 11         | 0 | 0 | 10       | 10    |
| 9  | 24_weeks_post_dose_arm_1 | 11/30/2021 | 0.4   | 870          | 350          | 3657       | 1 | 0 |          |       |
| 1  | baseline_arm_1           | 5/18/2021  | 0.4   | No PBMC      | No PBMC      | 208        | 1 | 0 | 10       | 10    |
| 1  | 4_weeks_post_dose_arm_1  | 8/18/2021  | 241   | 20           | 0            | 11477      | 1 | 0 | 329.1    | 10    |
| 15 | baseline_arm_1           | 6/4/2021   | 0.4   | 0            | 0            | 90         | 0 | 0 | 10       | 10    |
| 15 | 4_weeks_post_dose_arm_1  | 7/28/2021  | 0.4   | No PHA       | No PHA       | 144        | 0 | 0 | 14       | 10    |
| 15 | bv_4_weeks_post_do_arm_2 | 10/6/2021  | 5061  | 30           | 70           | 8423       | 0 | 0 |          |       |
| 15 | bv_24_weeks_post_d_arm_2 | 3/8/2022   | 587.2 | 130          | 700          | 2113       | 0 | 0 | 499.6    | 124.4 |
